# Supplementary material
Source: PubMed Central journal article supplement (PMC3487715)
Supplement: NIHMS408098-supplement-Supporting_materials.pdf [file NIHMS408098-supplement-Supporting_materials.pdf]

**Supplementary materials:**

**New ratiometric optical oxygen and pH dual sensors with three emission colors for measuring photosynthetic activity in Cyanobacteria**

Hongguang Lu, Yuguang Jin, Yanqing Tian, Weiwen Zhang, Mark R. Holl, Deirdre R. Meldrum

Center for Biosignatures Discovery Automation, The Biodesign Institute, Arizona State

University, PO Box 875801, Tempe, AZ 85287-5801

Synthesis of **4** (S-Scheme 1). A mixture of 1.4 g of compound **1** (2.79 mmol) from Sigma-Aldrich, 3.0 g of compound **2** [S1] (6.83 mmol), and 40 mg of Pd(PPh<sub>3</sub>)<sub>4</sub> was suspended in 30 mL of THF and 10 mL of 2M K<sub>2</sub>CO<sub>3</sub> aqueous solution. The mixture was heated at 80 °C under nitrogen for 16 hours. After pouring the reaction mixture into water, the organic material (intermediate **3**) was extracted into CH<sub>2</sub>Cl<sub>2</sub> and was used without purification. The raw material **3** was dissolved in 20 mL THF. 0.2 g of NaBH<sub>4</sub> was added into the THF solutions. The mixture was stirred at room temperature for 6 hours. After adding the THF with 20 mL of cold water, the organic materials were extracted into CH<sub>2</sub>Cl<sub>2</sub>. After removing the CH<sub>2</sub>Cl<sub>2</sub>, the product was purified by column chromatography and then crystallized from methanol to get the compound **4**. Yield: 40%. <sup>1</sup>H NMR (CDCl<sub>3</sub>, δ, ppm): 7.79 (m, 6H), 7.66 (m, 8H), 7.33 (m, 4H), 4.79 (s, 4H), 2.05 (m, 12H), 1.07 (m, 36H), 0.74 (m, 30H). <sup>13</sup>C NMR (CDCl<sub>3</sub>, δ, ppm): 151.76, 151.61, 151.53, 140.53, 140.46, 139.97, 139.75, 126.12, 125.86, 125.59, 121.49, 119.89, 119.94, 119.74, 65.84, 55.29, 55.17, 40.34, 31.46, 31.42, 29.67, 23.79, 22.56, 22.52, 13.99. MALDI-Mass: C<sub>77</sub>H<sub>102</sub>O<sub>2</sub> Calc. 1058.79, found: 1058.84.

Synthesis of **IRP**. 500 mg of methacryloyl chloride (5 mmol) in 1 mL THF was added to a solution of 300 mg of compound **3** (0.28 mmol) in 10 mL of anhydrous THF with 1 mL of Et<sub>3</sub>N at 0 - 5°C. The mixture was warmed to room temperature and the reaction mixture was stirred at room temperature for overnight. The mixture was poured into 100 mL of water. The product was extracted into 100 mL of CH<sub>2</sub>Cl<sub>2</sub>. After the CH<sub>2</sub>Cl<sub>2</sub> was removed the product was crystallized from methanol to obtain 200 mg of product of **IRP**. Yield: 59%. <sup>1</sup>H NMR (400 MHz, CDCl<sub>3</sub>): 7.79 (4H, m), 7.65 (10H, m), 7.61 (4H, m), 6.17 (s, 2H), 5.59 (s, 2H), 5.27 (s, 4H), 2.01 & 1.98

(18H, m & s), 1.07 (m, 36H), 0.75 (m, 30H).  $^{13}\text{C}$  NMR ( $\text{CDCl}_3$ ,  $\delta$ , ppm): 167.31, 151.76, 151.71, 151.371, 140.87, 140.67, 140.41, 139.99, 136.36, 134.77, 127.03, 126.09, 125.67, 122.83, 121.44, 119.99, 119.69, 66.89, 55.29, 55.15, 40.23, 31.42, 29.61, 23.77, 22.51, 18.35, 13.99. MALDI-Mass:  $\text{C}_{85}\text{H}_{110}\text{O}_4$  Calc. 1194.84, found: 1194.99.

[S1]: Y. Q. Tian, C. -Y. Chen, C. -C. Yang, A. C. Young, S. -H. Jang, W. -C. Chen, A. K. -Y. Jen, *Chem. Mater.*, 2008, **20**, 1977-1987.

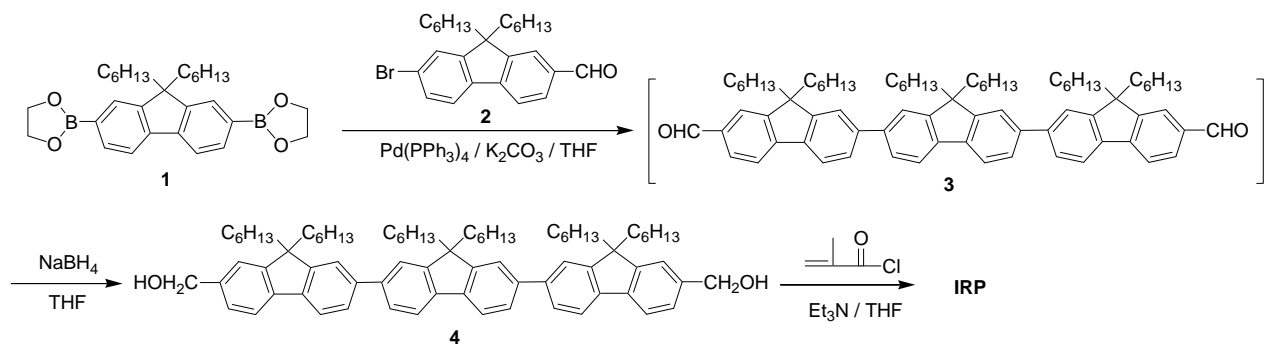

S-Scheme 1

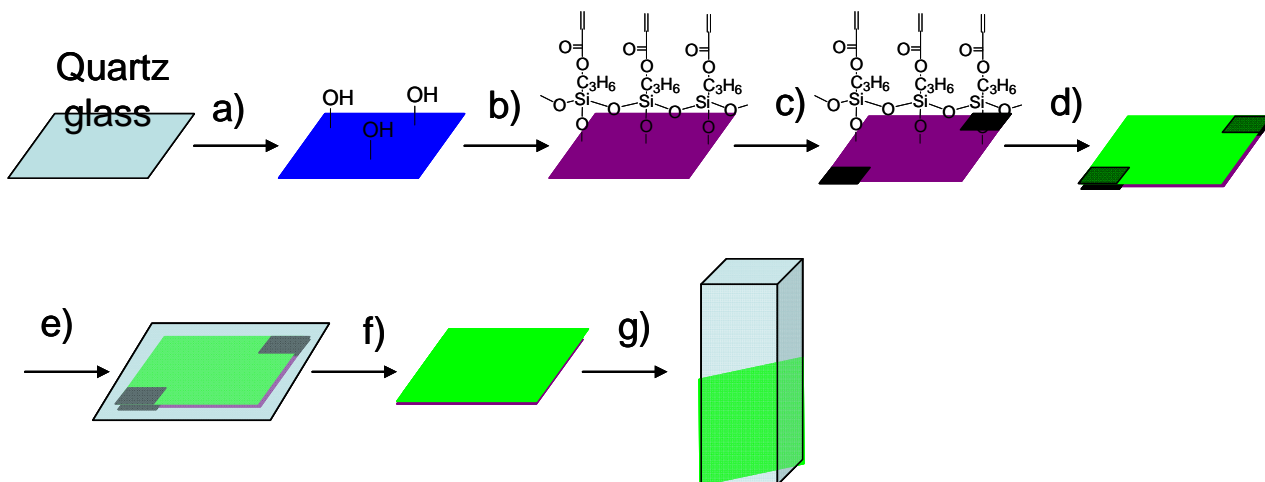

S-Figure 1. Schematic illustration of the preparation of sensing membranes. a) oxygen plasma treatment to generate active hydroxyl groups; b) vapor deposition of thin TMSPA layer; c) 25- $\mu\text{m}$  tape used to control membrane thickness; d) sensor solution dispensed onto modified quartz surface; e) solution covered with a cover glass and polymerized at 80°C for 1.5 hours; f) cover glass and tape removed; film rinsed using methanol and double-distilled water; and g) sensing membrane on quartz substrate immersed into liquid in cuvette for fluorescence measurements.

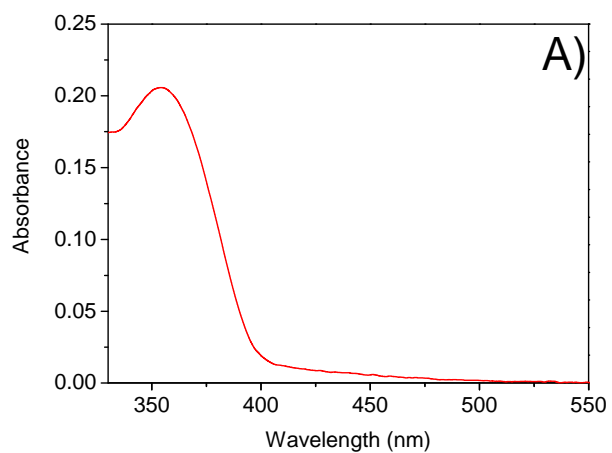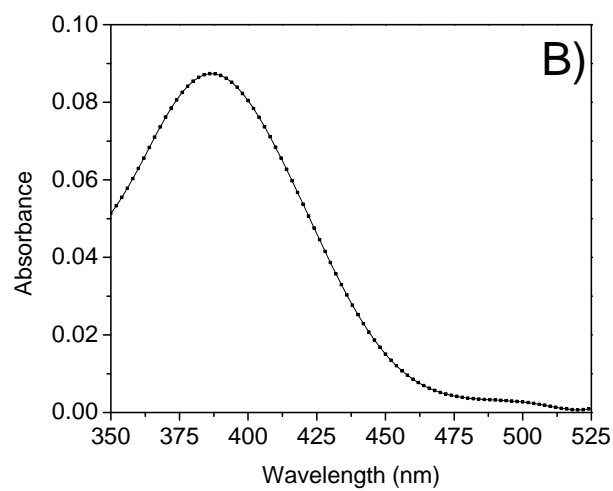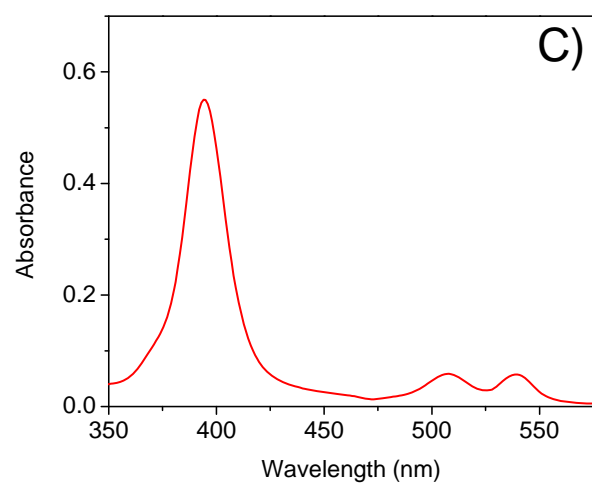

S-Figure 2. Absorbance spectra of the individual **IRP** (A), **pHS** (B), and **OS** (C) in their PHEMA-co-PAM thin films.

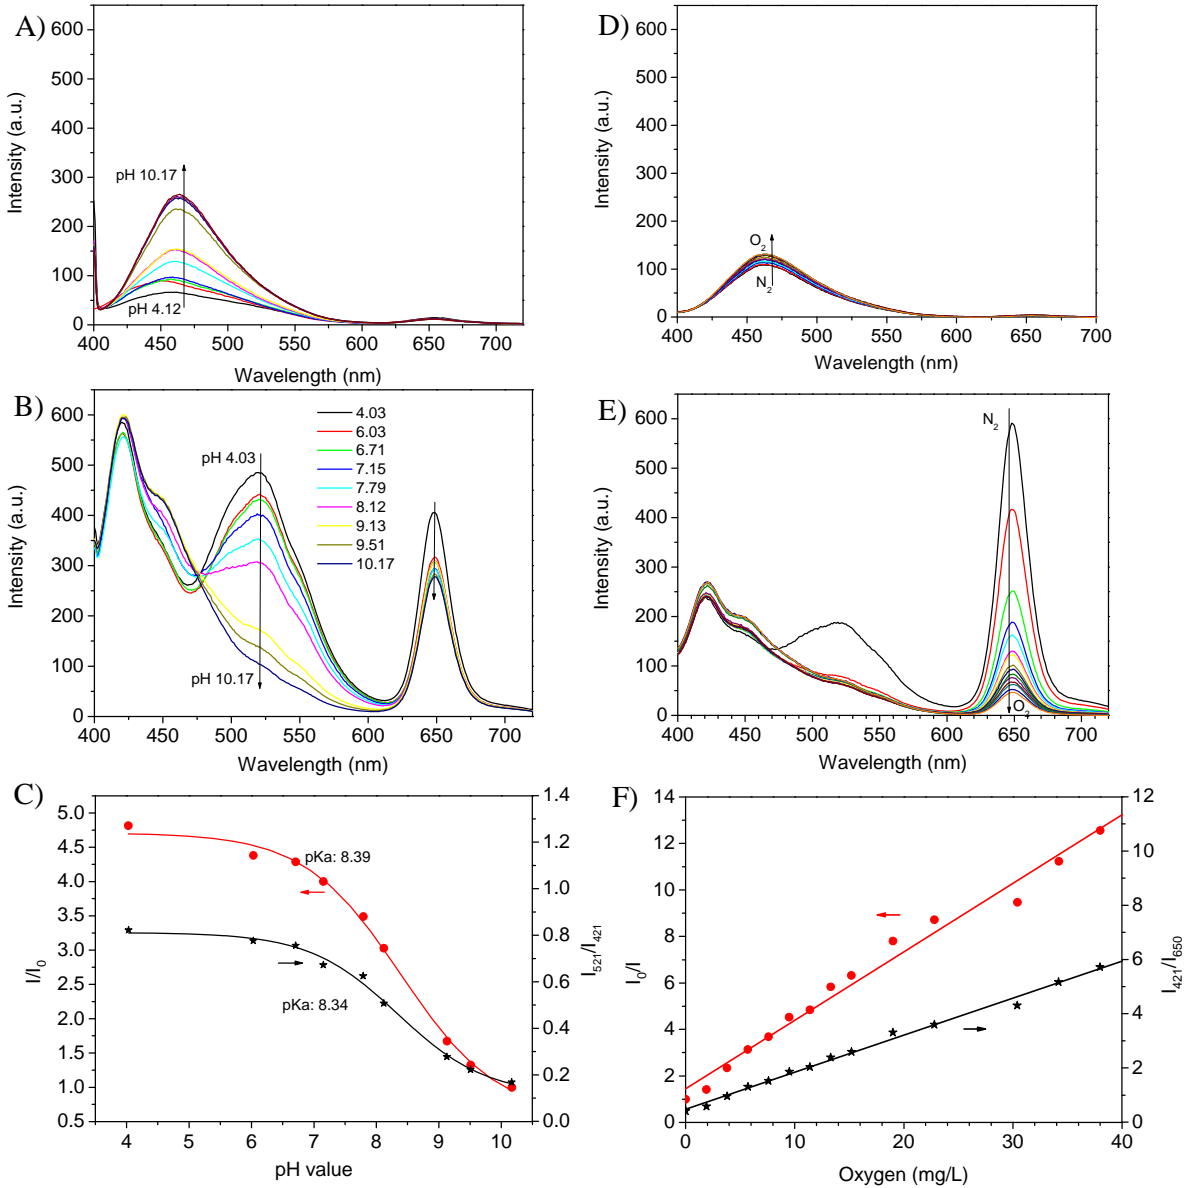

S-Figure 3. pH dependent emission spectra of cyanobacteria ( $OD_{730}$  of 0.75) (A); fluorescence spectra of the sensing film with the cyanobacteria at different pH values (B);  $pK_a$  values calculated using the **pHS**'s emission intensities at 521 nm and the ratiometric intensities ratios at 521 nm and 421 nm as described in the text (C); dissolved oxygen dependent emission spectra of cyanobacteria ( $OD_{730}$  of 0.75) (D); fluorescence spectra of the sensing film with the cyanobacteria at different dissolved oxygen concentrations (E); Stern-Volmer fittings using the **OS**'s emission intensities at 650 nm and the ratiometric intensities ratios at 650 nm and 421 nm as described in the text (F).

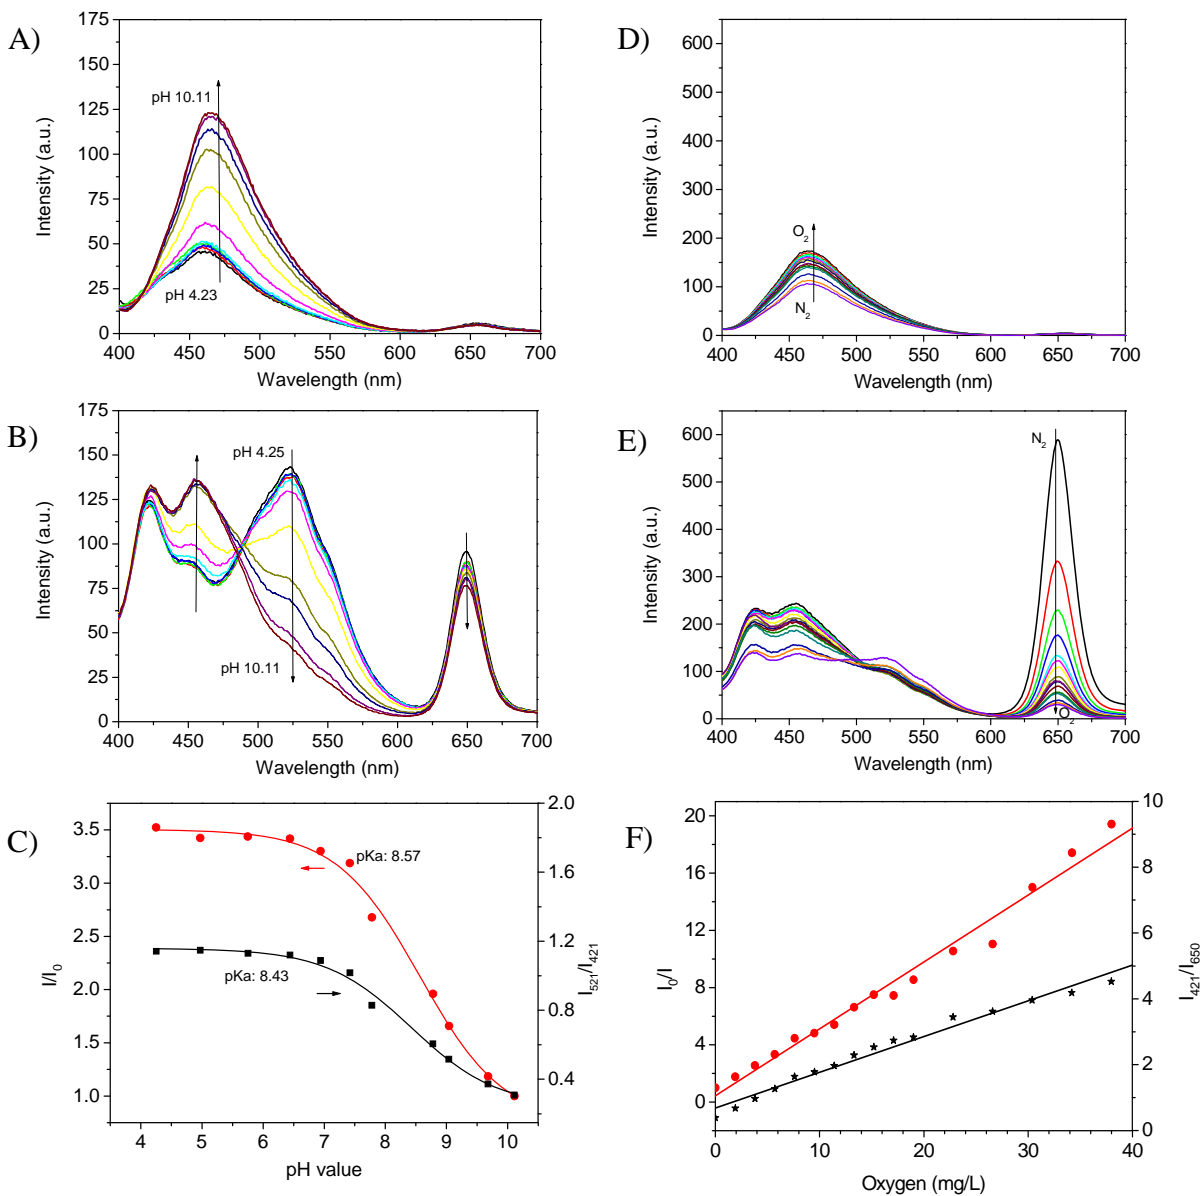

S-Figure 4. pH dependent emission spectra of cyanobacteria ( $OD_{730}$  of 1.50) (A); fluorescence spectra of the sensing film with the cyanobacteria at different pH values (B);  $pK_a$  values calculated using the **pHS**'s emission intensities at 521 nm and the ratiometric intensities ratios at 521 nm and 421 nm as described in the text (C); dissolved oxygen dependent emission spectra of cyanobacteria ( $OD_{730}$  of 0.75) (D); fluorescence spectra of the sensing film with the cyanobacteria at different dissolved oxygen concentrations (E); Stern-Volmer fittings using the **OS**'s emission intensities at 650 nm and the ratiometric intensities ratios at 650 nm and 421 nm as described in the text (F).



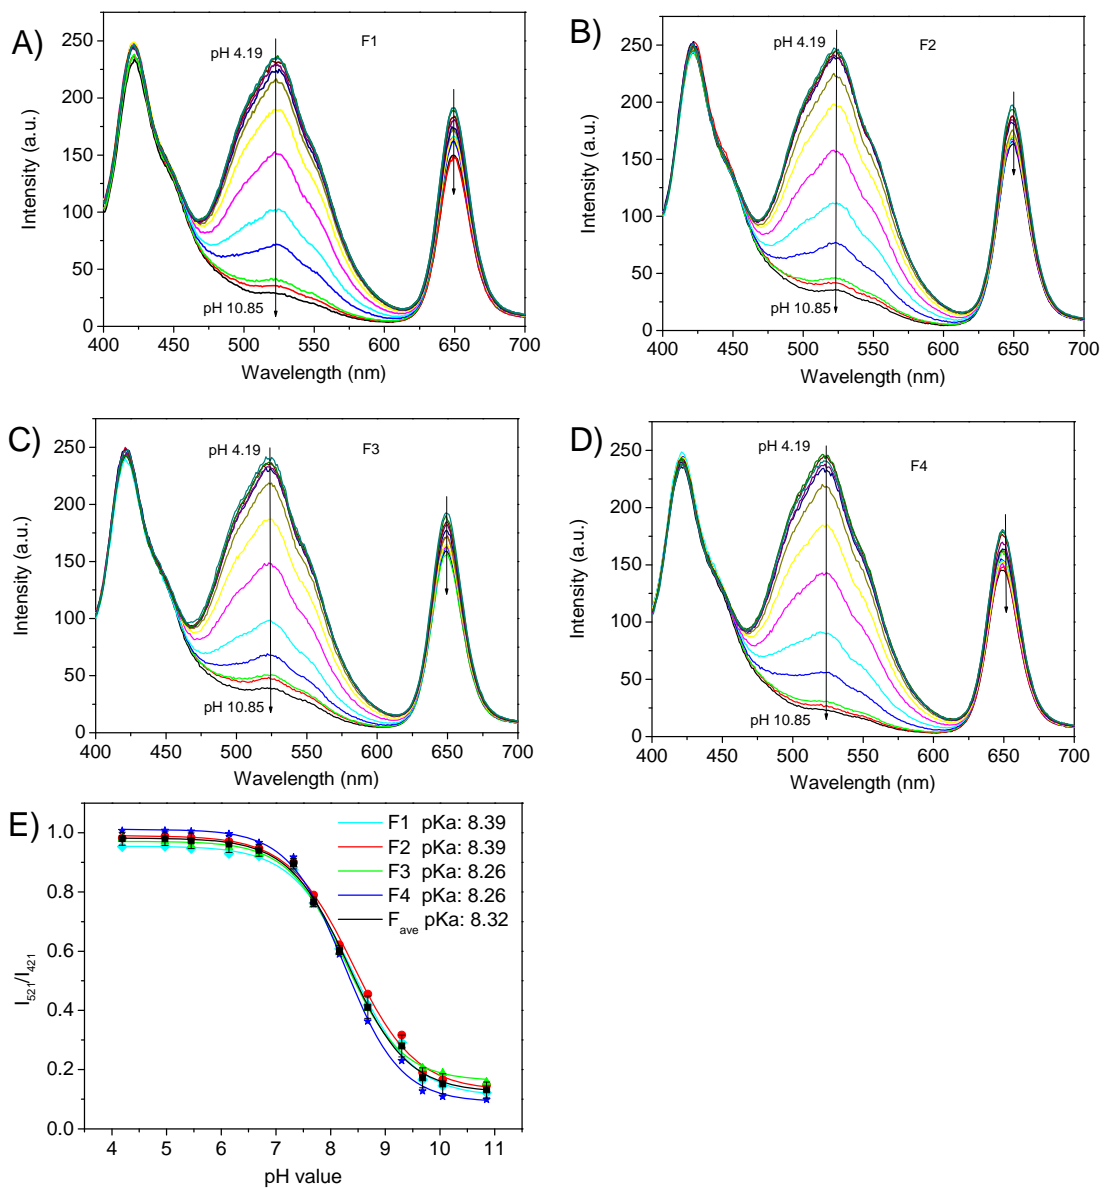

S-Figure 5. pH dependent emission spectra of four individual films (F1- A, F2- B, F3-C, and F4- D) in cyanobacteria ( $OD_{730}$  of 0.5). E gives the comparison of the  $pK_a$  values of the four films and the average  $pK_a$  value for demonstration of the reproducibility of the films.

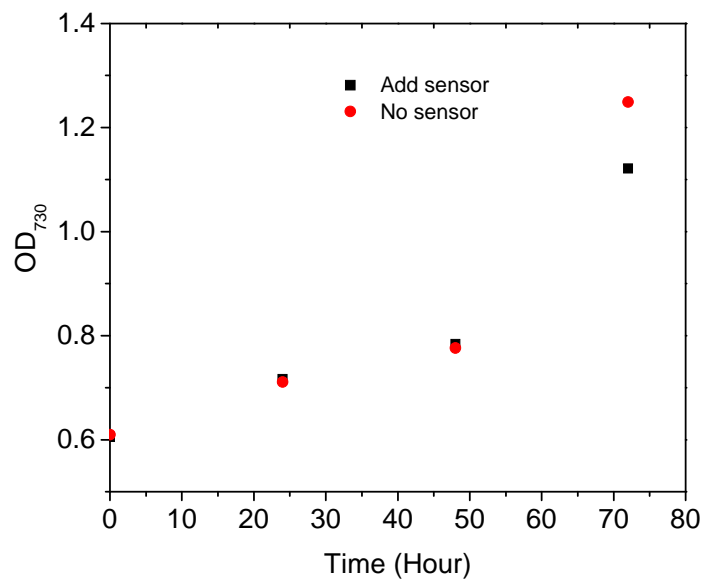

S-Figure 6. The changes of OD<sub>730</sub> of cells with and without a sensor film. The sensor film has no obvious toxicity to cells for 48 hours.

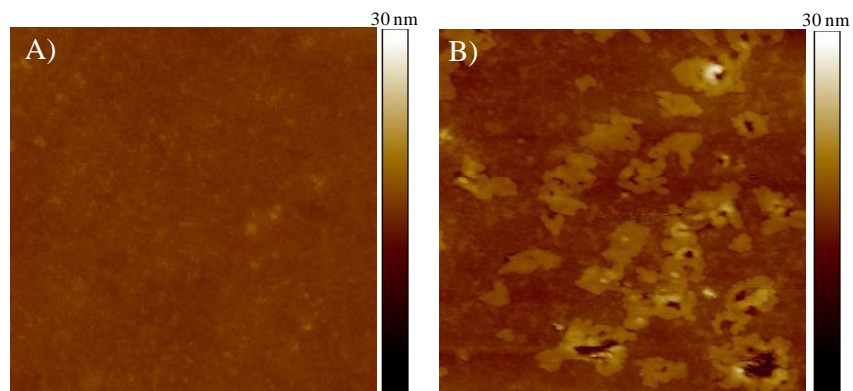

S-Figure 7. Surface morphologies of a typical sensing film freshly prepared (A) and after swollen by water (B) measured using atomic force microscopy (AFM). The image area is  $1.5 \times 1.5 \mu\text{m}$ . Roughness of the freshly prepare film is 0.46 nm. Roughness of the swollen film is 3.6 nm.
